# Supplementary material for: Application of BSA-bioconjugated phosphorescence nanohybrids in protein detection in biofluids
Source: Royal Society of Chemistry journal article supplement (doi:10.1039/c5ra11691k), 2015-01-01
Supplement: c5ra11691k1.pdf [file c5ra11691k1.pdf]

## Supplementary Materials:

**Table S1** Effect of co-existing substances on the RTP intensity of 10 nM lysozyme.

| Co-existing substance | [Co-existing substance] / [DNA] | Change of the RTP Intensity (%) |
|-----------------------|---------------------------------|---------------------------------|
| K <sup>+</sup>        | 1×10 <sup>6</sup>               | -2.9                            |
| Na <sup>+</sup>       | 4×10 <sup>6</sup>               | -3.7                            |
| Ca <sup>2+</sup>      | 8×10 <sup>3</sup>               | -4.3                            |
| Mg <sup>2+</sup>      | 1.0×10 <sup>4</sup>             | -3.4                            |
| <i>L</i> -Cys         | 10000                           | +3.6                            |
| <i>L</i> -His         | 200000                          | +4.6                            |
| <i>L</i> -Gly         | 200000                          | +3.4                            |
| Human serum albumin   | 20 mg L <sup>-1</sup>           | +2.8                            |
